# Supplementary material for: Mechano Growth Factor Accelerates ACL Repair and Improves Cell Mobility of Mechanically Injured Human ACL Fibroblasts by Targeting Rac1-PAK1/2 and RhoA-ROCK1 Pathways
Source: MDPI journal article supplement (doi:10.3390/ijms23084331), 2022-04-14
Supplement: s1 [file s1]

Supplementary figures and table

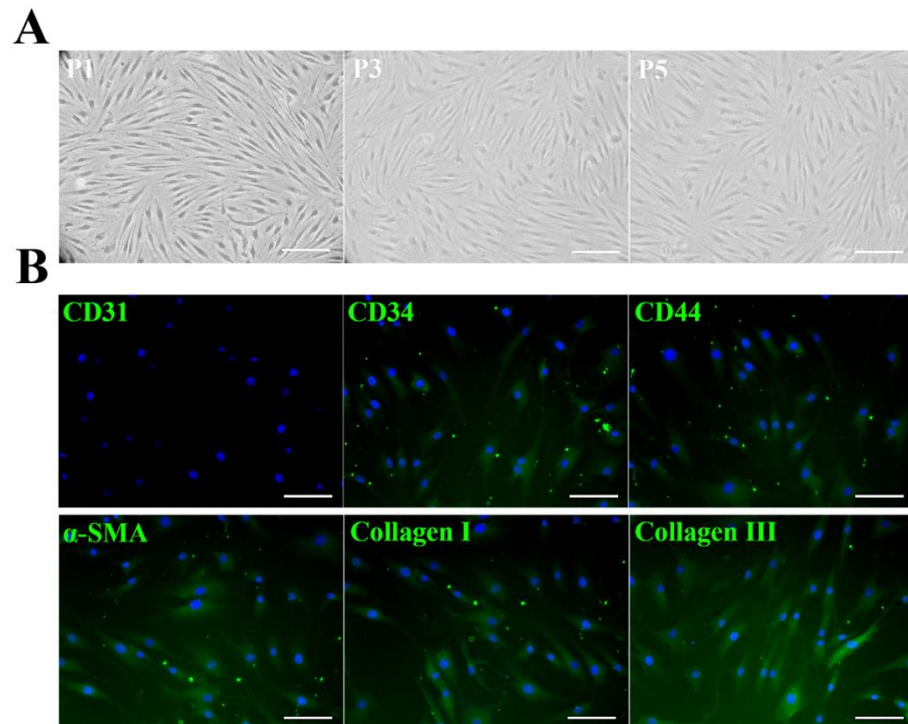

**Figure S1.** Cell identification of human anterior cruciate ligament fibroblasts. (A) Cell morphology of hACLFs in passage 1/3/5. (B) Expression of CD31, CD34, CD44,  $\alpha$ -SMA and type collagen I/III were detected as cell markers through immunofluorescence staining. Scale bar= 100  $\mu$ m.

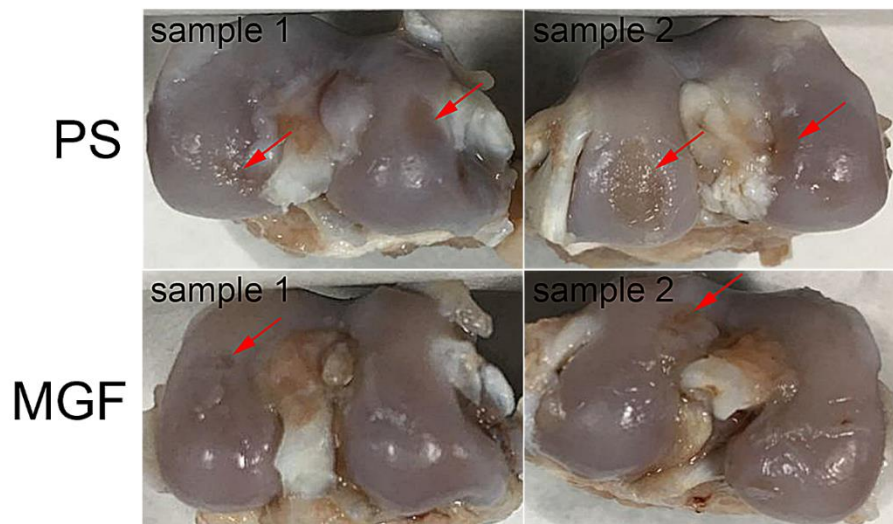

**Figure S2.** MGF (1  $\mu$ g/ml) attenuated the progression of osteoarthritis after ACL transection surgery for 2 months in rabbits. PS: physiological saline. Red arrow: cartilage degradation.

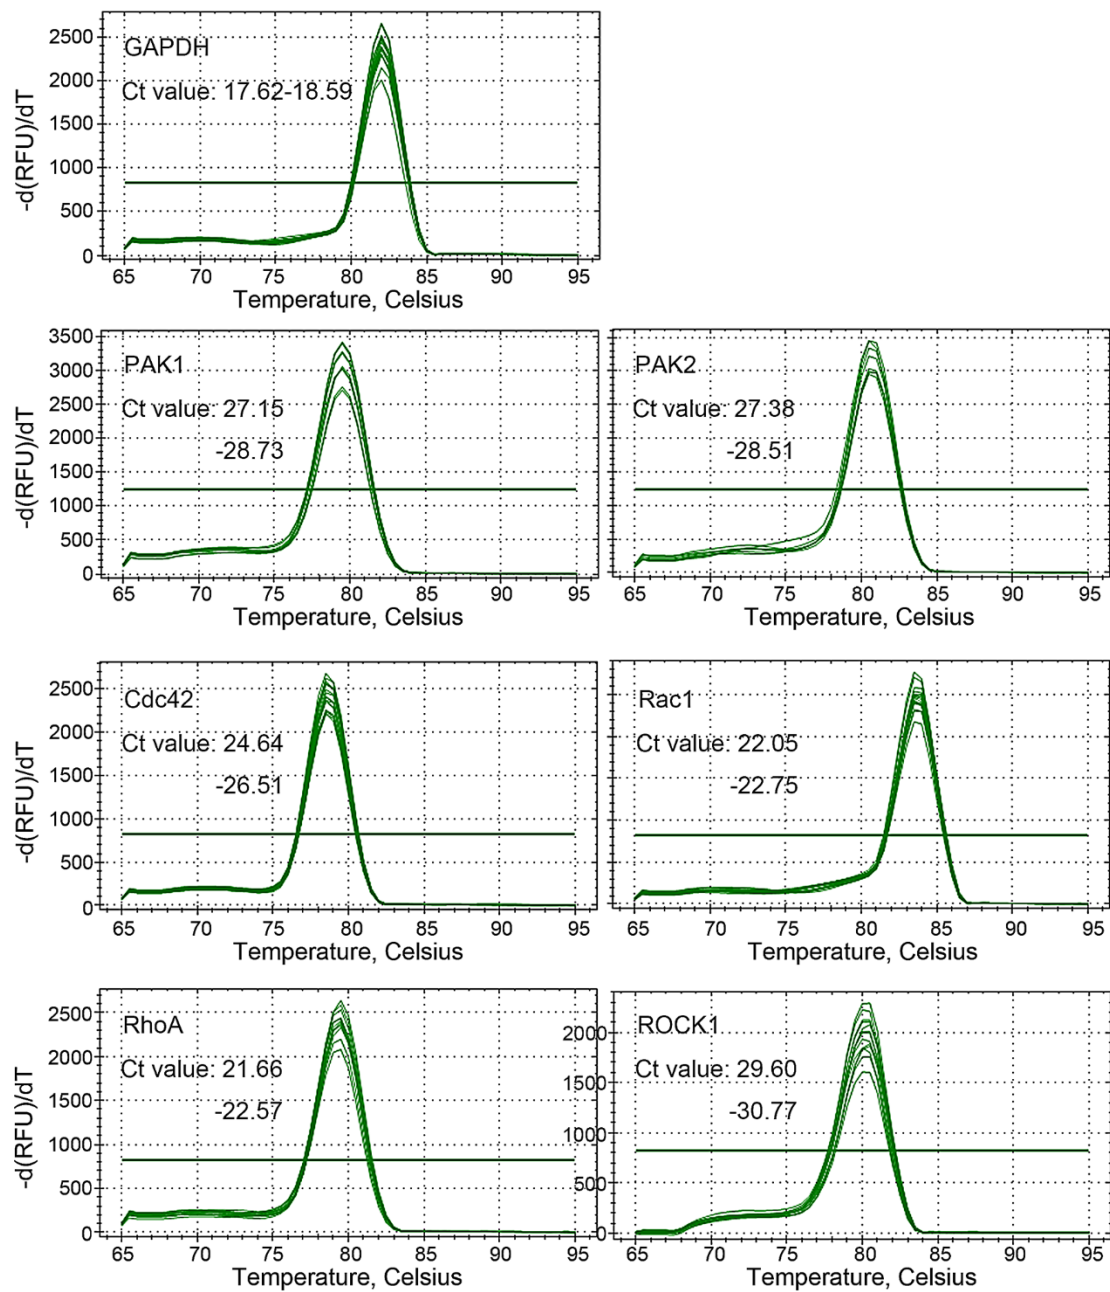

**Figure S3.** Melt curves and Ct values of the primes of GAPDH, PAK1, PAK2, Cdc42, Rac1, RhoA and ROCK1 in qRT-PCR analysis.

**Table S1.** Criteria for histological assessment.

| Ligament Tissue Maturity Index (Total = 28) |                                                                  |                                                            |          |
|---------------------------------------------|------------------------------------------------------------------|------------------------------------------------------------|----------|
| Cellularity subscore<br>(total = 10)        | Presence of inflammatory cells                                   | Necrosis                                                   | 0 points |
|                                             |                                                                  | Polymorphonuclear cells                                    | 1 points |
|                                             |                                                                  | No inflammatory cells                                      | 2 points |
|                                             | Number of fibroblasts                                            | None                                                       | 0 points |
|                                             |                                                                  | More than 2×normal ligament                                | 1 points |
|                                             |                                                                  | Less than 2×normal ligament                                | 2 points |
|                                             | Nuclear aspect ratio (NAR) of fibroblasts                        | No cells                                                   | 0 points |
|                                             |                                                                  | Avg NAR less than 2                                        | 1 points |
|                                             |                                                                  | Avg NAR greater than 2                                     | 2 points |
|                                             | Orientation: Long axis of nucleus parallel with normal fascicles | No cells                                                   | 0 points |
|                                             |                                                                  | Less than 30% of cells oriented                            | 1 points |
|                                             |                                                                  | More than 30% of cells oriented                            | 2 points |
|                                             | Arrangement of cells into columns                                | No cells                                                   | 0 points |
|                                             |                                                                  | Cells in columns of 2 to 3                                 | 1 points |
|                                             |                                                                  | Cells in columns of more than 3                            | 2 points |
| Collagen subscore<br>(Total = 12)           | Width of bundles                                                 | No bundles                                                 | 0 points |
|                                             |                                                                  | Width less than 50 mm                                      | 2 points |
|                                             |                                                                  | Width greater than 50 mm                                   | 4 points |
|                                             | Bundle orientation                                               | No orientation                                             | 0 points |
|                                             |                                                                  | Presence of bundles perpendicular to long axis of ligament | 2 points |
|                                             |                                                                  | Presence of bundles parallel to long axis of ligament      | 4 points |
|                                             | Crimp                                                            | None present                                               | 0 points |
|                                             |                                                                  | Crimp length < 0.5 normal length                           | 2 points |
|                                             |                                                                  | Crimp with normal length present                           | 4 points |
| Vascularity subscore<br>(total = 6)         | Density of blood vessels                                         | None present                                               | 0 points |
|                                             |                                                                  | Twice as many as normal present                            | 1 points |
|                                             |                                                                  | Less than twice normal present                             | 2 points |
|                                             | Orientation of vessels with long axis of ligament                | No vessels oriented                                        | 0 points |
|                                             |                                                                  | Less than 30% oriented                                     | 1 points |
|                                             |                                                                  | More than 30% oriented                                     | 2 points |
|                                             | Vessel maturity                                                  | No vessels seen                                            | 0 points |
|                                             |                                                                  | Capillaries only present                                   | 1 points |
|                                             |                                                                  | Arterioles present                                         | 2 points |
